# Supplementary material for: Diversity Is Not Everything
Source: MDPI journal article supplement (doi:10.3390/land10101091), 2021-10-15
Supplement: s1 [file s1]

## Supplementary Materials

**Table S1.** Abundance of soil PLFA biomarkers by site with growing season and seed mix treatment interactions. Growing seasons followed by the same upper-case letter are not significantly different at  $P < 0.05$ . Pairs of values of the seed mix treatment within a site followed by the same lower-case letter is not significantly different at  $P < 0.05$ .

|               |             |              | Total microbial biomass |     | Total fungal biomass |     | Total bacterial biomass |     | Arbuscular mycorrhizal fungi | Gram-negative bacteria |      | Gram-positive bacteria |      | Saprophytic fungi |      | Actinomycetes |       | Fungi: bacteria ratio |      |      |
|---------------|-------------|--------------|-------------------------|-----|----------------------|-----|-------------------------|-----|------------------------------|------------------------|------|------------------------|------|-------------------|------|---------------|-------|-----------------------|------|------|
| Joyce Hill    | GS 2 (2016) | Native Light | 139.5                   | A   | 48.8                 | A   | 88.2                    | bc  | 8.76                         | a                      | 27.8 | NS                     | 43.7 | bc                | 40   | NS            | 12.31 | ab                    | 0.55 | a    |
|               |             | Native Heavy | 107.2                   | A   | 43.3                 | A   | 61.8                    | ab  | 15.52                        | ab                     | 17.7 | NS                     | 33.2 | bc                | 27.5 | NS            | 7.77  | ab                    | 0.70 | ab   |
|               |             | Traditional  | 114.4                   | A   | 46.6                 | A   | 65.1                    | abc | 14.07                        | ab                     | 19.7 | NS                     | 33   | bc                | 32.1 | NS            | 9.07  | abc                   | 0.72 | abc  |
|               | GS 4 (2018) | Native Light | 106.4                   | A   | 48.1                 | A   | 56.3                    | ab  | 18.92                        | ab                     | 31.4 | NS                     | 14.8 | a                 | 29.2 | NS            | 8.02  | ab                    | 0.87 | abc  |
|               |             | Native Heavy | 118.1                   | A   | 43.9                 | A   | 72.4                    | abc | 11.78                        | ab                     | 33.2 | NS                     | 23.4 | ab                | 31.9 | NS            | 12.47 | abc                   | 0.61 | a    |
|               |             | Traditional  | 94.7                    | A   | 45.7                 | A   | 46.9                    | a   | 22                           | ab                     | 26   | NS                     | 12.9 | a                 | 22.9 | NS            | 5.96  | a                     | 0.98 | bc   |
|               | GS 5 (2019) | Native Light | 246.9                   | B   | 122.9                | B   | 117.6                   | c   | 67.29                        | c                      | 37.9 | NS                     | 57.2 | c                 | 55.4 | NS            | 16.33 | c                     | 1.05 | c    |
|               |             | Native Heavy | 182.5                   | B   | 87.1                 | B   | 89.1                    | bc  | 24.8                         | b                      | 28.8 | NS                     | 43.5 | c                 | 61.9 | NS            | 11.9  | abc                   | 0.99 | bc   |
|               |             | Traditional  | 142.5                   | B   | 58.5                 | B   | 80.2                    | bc  | 22.08                        | ab                     | 26.5 | NS                     | 38.1 | bc                | 36.2 | NS            | 11.14 | bc                    | 0.73 | abc  |
| Middleton Run | GS 2 (2016) | Native Light | 99.6                    | a   | 48.4                 | AB  | 50.6                    | NS  | 14.3                         | A a                    | 17.9 | NS                     | 21.3 | A                 | 33.9 | ab            | 8.55  | a                     | 0.99 | NS   |
|               |             | Native Heavy | 157.4                   | b   | 77                   | B   | 78.1                    | NS  | 21.5                         | b                      | 27.3 | NS                     | 32.2 | A                 | 55.2 | b             | 14.19 | b                     | 0.99 | NS   |
|               |             | Traditional  | 84.7                    | a   | 42.6                 | A   | 40.6                    | NS  | 9.3                          | c                      | 12.8 | NS                     | 20   | A                 | 32.6 | a             | 5.25  | a                     | 1.05 | NS   |
|               | GS 4 (2018) | Native Light | 119.8                   | a   | 63.4                 | AB  | 56.3                    | NS  | 25.3                         | A a                    | 26.4 | NS                     | 18.2 | A                 | 38.1 | ab            | 9.23  | a                     | 1.16 | NS   |
|               |             | Native Heavy | 136.9                   | b   | 68.6                 | B   | 66.6                    | NS  | 24.4                         | b                      | 32.3 | NS                     | 20.5 | A                 | 44   | b             | 11.56 | b                     | 1.03 | NS   |
|               |             | Traditional  | 116.1                   | a   | 48.8                 | A   | 66.7                    | NS  | 16.1                         | c                      | 34.2 | NS                     | 20.3 | A                 | 32.6 | a             | 8.9   | a                     | 0.75 | NS   |
|               | GS 5 (2019) | Native Light | 150.5                   | a   | 76.1                 | AB  | 70                      | NS  | 36.8                         | B a                    | 22.1 | NS                     | 34.4 | B                 | 40   | ab            | 10.64 | a                     | 1.08 | NS   |
|               |             | Native Heavy | 180.5                   | b   | 95.4                 | B   | 80.3                    | NS  | 42.9                         | b                      | 26.1 | NS                     | 37.1 | B                 | 51.5 | b             | 12.65 | b                     | 1.20 | NS   |
|               |             | Traditional  | 153.7                   | a   | 66                   | A   | 87.8                    | NS  | 25.6                         | c                      | 28.4 | NS                     | 41.9 | B                 | 40.4 | a             | 12.49 | a                     | 0.78 | NS   |
| Rose Valley   | GS 2 (2016) | Native Light | 130                     | A a | 53.5                 | A a | 76                      | NS  | 17.9                         | ab                     | 26.7 | NS                     | 33.6 | A                 | 35.5 | a             | 11    | ab                    | 0.70 | abcd |
|               |             | Native Heavy | 236                     | b   | 111                  | b   | 126.1                   | NS  | 35.3                         | b                      | 44   | NS                     | 54   | A                 | 75.2 | b             | 18.7  | abcd                  | 0.89 | cde  |
|               |             | Traditional  | 174                     | a   | 64.9                 | a   | 109.2                   | NS  | 16.7                         | ab                     | 38.6 | NS                     | 49   | A                 | 48.2 | a             | 14.5  | a c                   | 0.59 | ab   |
|               | GS 4 (2018) | Native Light | 176                     | A a | 80.6                 | A a | 92.7                    | NS  | 31.2                         | b                      | 44.7 | NS                     | 28.9 | B                 | 49.4 | a             | 14.4  | abcd                  | 0.87 | bcde |
|               |             | Native Heavy | 235                     | b   | 101.5                | b   | 136                     | NS  | 26.2                         | ab                     | 61.5 | NS                     | 43.9 | B                 | 74.9 | b             | 21.9  | abcd                  | 0.74 | abcd |
|               |             | Traditional  | 127                     | a   | 45.1                 | a   | 80.3                    | NS  | 10.6                         | a                      | 36.9 | NS                     | 25.2 | B                 | 34.5 | a             | 14.3  | abcd                  | 0.56 | a    |
|               | GS 5        | Native Light | 238                     | B a | 129.9                | B a | 105.6                   | NS  | 68                           | c                      | 34.3 | NS                     | 49.4 | C                 | 61.7 | a             | 15    | cd                    | 1.24 | e    |

|            |              |     |   |     |   |       |    |           |          |             |          |      |    |      |   |             |             |             |            |             |
|------------|--------------|-----|---|-----|---|-------|----|-----------|----------|-------------|----------|------|----|------|---|-------------|-------------|-------------|------------|-------------|
| (20<br>19) | Native Heavy | 299 | b | 141 | b | 154.6 | NS | <b>71</b> | <b>c</b> | 51.4        | NS       | 72.7 | C  | 68.8 | b | <b>21.9</b> | <b>abcd</b> | <b>0.92</b> | <b>de</b>  |             |
|            | Traditional  | 256 |   |     | a | 94.3  | a  | 157.2     | NS       | <b>30.2</b> | <b>b</b> | 55   | NS | 69.3 | C | 64.1        | a           | <b>24.8</b> | <b>b d</b> | <b>0.60</b> |

**Table S2.** Phosphorus concentrations (ppm) by site and growing season interaction and by site and seed mix treatment interaction. Values are estimated marginal means with one standard error in parentheses. Šidák-adjusted comparisons were made among estimated marginal means. Growing seasons followed by the same upper-case letter are not significantly different at  $P < 0.05$ . Pairs of values of the seed mix treatment within a site followed by the same lower-case letter is not significantly different at  $P < 0.05$ .

| Site/Growing Season or Seed Mix | GS2 (2016)        | GS 6 (2020)       | Native Light      | Native Heavy       | Traditional       |
|---------------------------------|-------------------|-------------------|-------------------|--------------------|-------------------|
| Joyce Hill B                    | 8.68 (1.12)<br>a  | 6.49 (0.84)<br>a  | 8.68 (1.37)<br>a  | 7.18 (1.13)<br>a   | 6.78 (1.07)<br>a  |
| Middleton Run A                 | 32.45 (4.18)<br>a | 15.38 (1.98)<br>b | 16.01 (2.52)<br>b | 21.09 (3.33)<br>ab | 33.02 (5.21)<br>a |
| Rose Valley C                   | 10.94 (1.41)<br>a | 1.30 (0.17)<br>b  | 2.89 (0.48)<br>a  | 3.67 (0.61)<br>a   | 5.05 (0.84)<br>a  |

**Table S3.** Magnesium concentrations (ppm) by site and growing season interaction and by site and seed mix treatment interaction. Values are estimated marginal means with one standard error in parentheses. Šidák-adjusted comparisons were made among estimated marginal means. Growing seasons followed by the same upper-case letter are not significantly different at  $P < 0.05$ . Pairs of values of the seed mix treatment within a site followed by the same lower-case letter is not significantly different at  $P < 0.05$ .

| Site/Growing Season or Seed Mix | GS2 (2016)      | GS 6 (2020)     | Native Light    | Native Heavy     | Traditional     |
|---------------------------------|-----------------|-----------------|-----------------|------------------|-----------------|
| Joyce Hill A                    | 520 (26.4)<br>a | 505 (25.6)<br>a | 442 (27.6)<br>b | 546 ± 34.1<br>ab | 556 (34.7)<br>a |
| Middleton Run B                 | 495 (25.1)<br>a | 360 (18.2)<br>b | 475 (29.7)<br>a | 429 ± 26.8<br>ab | 368 (23.0)<br>b |
| Rose Valley A                   | 533 (27.0)<br>a | 443 (22.5)<br>b | 483 (34.4)<br>a | 442 ± 31.4<br>a  | 537 (38.2)<br>a |

**Table S4.** Calcium concentrations (ppm) by site and growing season interaction and by site and seed mix treatment interaction. Values are estimated marginal means with one standard error in parentheses. Šidák-adjusted comparisons were made among estimated marginal means. Growing seasons followed by the same upper-case letter are not significantly different at  $P < 0.05$ . Pairs of values of the seed mix treatment within a site followed by the same lower-case letter is not significantly different at  $P < 0.05$ .

| Site/Growing Season or Seed Mix | GS2 (2016)        | GS 6 (2020)       | Native Light      | Native Heavy      | Traditional       |
|---------------------------------|-------------------|-------------------|-------------------|-------------------|-------------------|
| Joyce Hill B                    | 1641<br>(76.0) a  | 1743<br>(80.7) a  | 1338<br>(78.5) b  | 1812<br>(102.8) a | 1930<br>(109.5) a |
| Middleton Run C                 | 1027<br>(47.6) a  | 758<br>(35.1) b   | 913<br>(51.8) a   | 867<br>(49.2) a   | 868<br>(49.2) a   |
| Rose Valley A                   | 8136<br>(376.9) a | 4144<br>(192.0) b | 5673<br>(333.2) a | 6052<br>(355.5) a | 5703<br>(335.0) a |

**Table S5.** Suggested high diversity native mix for reclaimed land. This mix is designed to support local pollinators or other wildlife with a diverse flowering population (including varied colors and flower shapes) blooming through most of the growing season, with a comparable cost as traditional seeding. Costs are based on prices from Ernst Seed Company, Meadville, PA.

| COMMON NAME            | SCIENTIFIC NAME                                                   | % OF MIX | COST/LB  | COST IN 1 lb OF MIX |
|------------------------|-------------------------------------------------------------------|----------|----------|---------------------|
| Switchgrass            | <i>Panicum virgatum</i>                                           | 16%      | \$5.50   | \$0.88              |
| Indiangrass            | <i>Sorghastrum nutans</i>                                         | 14%      | \$17.60  | \$2.46              |
| Orchardgrass           | <i>Dactylis glomerata</i>                                         | 9%       | \$3.30   | \$0.30              |
| Perennial Ryegrass     | <i>Lolium perenne</i>                                             | 9%       | \$1.93   | \$0.17              |
| Browneyed Susan        | <i>Rudbeckia triloba</i>                                          | 2.50%    | \$52.80  | \$1.32              |
| Maximilian's Sunflower | <i>Helianthus maximiliani</i>                                     | 0.75%    | \$39.60  | \$0.30              |
| Common Milkweed        | <i>Asclepias syriaca</i>                                          | 0.75%    | \$149.60 | \$1.12              |
| Birdsfoot Trefoil      | <i>Lotus corniculatus</i>                                         | 5%       | \$5.78   | \$0.29              |
| Partridge Pea          | <i>Chamaecrista fasciculata</i>                                   | 18%      | \$7.60   | \$1.37              |
| Plains Coreopsis       | <i>Coreopsis tinctoria</i>                                        | 1.3%     | \$17.60  | \$0.23              |
| Purple Prairie Clover  | <i>Dalea purpurea</i>                                             | 1.5%     | \$39.60  | \$0.59              |
| Bigleaf Mountain Mint  | <i>Pycnanthemum muticum</i>                                       | 0.5%     | \$220.00 | \$1.10              |
| Roundhead Lespedeza    | <i>Lespedeza capitata</i>                                         | 1.5%     | \$118.80 | \$1.78              |
| Pennsylvania Smartweed | <i>Polygonum pensylvanicum</i><br><i>/Persicaria pensylvanica</i> | 12.2%    | \$13.20  | \$1.61              |
| Blue Vervain           | <i>Verbena hastata</i>                                            | 3%       | \$35.20  | \$1.06              |
| Wild Bergamot          | <i>Monarda fistulosa</i>                                          | 1%       | \$105.60 | \$1.06              |
| White Snakeroot        | <i>Eupatorium rugosum</i>                                         | 0.5%     | \$264.00 | \$1.32              |
| Purple Coneflower      | <i>Echinacea purpurea</i>                                         | 3.5%     | \$39.60  | \$1.39              |
| <b>Totals</b>          |                                                                   | 100.00%  |          | \$18.34             |
